# Supplementary material for: Improving the Comprehension of Pathogenicity and Phylogeny in ‘Candidatus Phytoplasma meliae’ through Genome Characterization
Source: MDPI journal article supplement (doi:10.3390/microorganisms12010142), 2024-01-11
Supplement: s1 [file s1]

**Table S1:** List of reference genomes used in this study. In bold draft genome obtained in this paper

| Ca. Phytoplasma         | strain          | 16Sr<br>group/subgroup | Host                            | Country          | accession                   | reference         |
|-------------------------|-----------------|------------------------|---------------------------------|------------------|-----------------------------|-------------------|
| Ca. P. asteris          | AYWB            | 16SrI-B                | <i>Lactuca sativa</i>           | USA              | CP000061.1                  | [26]              |
| Ca. P. asteris          | MBS             | 16SrI-B                | <i>Zea mays</i>                 | Brazil           | CP015149.1                  | [18]              |
| Ca. P. asteris          | OY-M            | 16SrI-A                | <i>Chrysanthemum coronarium</i> | Japan            | AP006628.2                  | [16]              |
| Ca. P. australiense     | PAa             | 16SrXII-B              | <i>Catharanthus roseus</i>      | Australia        | AM422018.1                  | [31]              |
| Ca. P. australiense     | NZSb11          | 16SrXII-B              | <i>Fragaria x anannassa</i>     | New Zealand      | CP002548.1                  | [40]              |
| Ca. P. mali             | AT              | 16SrX-A                | <i>Catharanthus roseus</i>      | Germany          | CU469464.1                  | [41]              |
| Ca. P. ziziphi          | Jbw-nky         | 16SrV-B                | <i>Ziziphus jujuba Mill.</i>    | China            | CP025121.1                  | [42]              |
| Ca. P. s. pruni         | ChTDIII         | 16SrIII-B              | <i>Melia azedarach</i>          | Argentina        | JABUOH000000000.1           | [43]              |
| Ca. P. solani           | SA-1            | 16SrXII-A              | <i>Vitis vinifera</i>           | Italy            | MPBG000000000.1             | [20]              |
| Ca. P. solani           | 231/09          | 16SrXII-A              | <i>Petroselinum sativum</i>     | Serbia           | FO393428.1                  | [44]              |
| Ca. P. solani           | 284/09          | 16SrXII-A              | <i>Nicotiana tabacum</i>        | Serbia           | FO393427.1                  | [44]              |
| Ca. P. australasiaticum | NTU2011         | 16SrII-V               | <i>Arachis hypogaea</i>         | Taiwan           | NZ_AMWZ000000000.1          | [17]              |
| Ca. P. hispanicum       | StrPh-CL        | 16SrXIII-F             | <i>Fragaria x anannassa</i>     | Chile            | JAGVRH000000000.1           | [30]              |
| <b>Ca. P. meliae</b>    | <b>ChTYXIII</b> | <b>1SrXIII-G</b>       | <b><i>Melia azedarach</i></b>   | <b>Argentina</b> | <b>NZ_JACAOD000000000.2</b> | <b>This paper</b> |
